# Supplementary material for: Noise-Induced Hearing Loss
Source: MDPI journal article supplement (doi:10.3390/jcm12062347), 2023-03-17
Supplement: s1 [file s1]

## SUPPLEMENTAL MATERIAL *for* Noise-Induced Hearing Loss

**Table S1. Clinical trials of interventions for NIHL registered at ClinicalTrials.gov without reported results**

| ClinicalTrial.gov ID/Name                                                                                | Year registered | Status                | Intervention                                    | Study design                    | Population, N                                        | Active arm, N                                        | Comparator arm, N                      | Primary outcome                                                                                                                                                                                                | Secondary outcomes                                                | Sponsor                            |
|----------------------------------------------------------------------------------------------------------|-----------------|-----------------------|-------------------------------------------------|---------------------------------|------------------------------------------------------|------------------------------------------------------|----------------------------------------|----------------------------------------------------------------------------------------------------------------------------------------------------------------------------------------------------------------|-------------------------------------------------------------------|------------------------------------|
| NCT05511753<br>: The effect of acupuncture on patients with noise-induced hearing loss                   | 2022            | Not yet recruiting    | Electro-acupuncture                             | Open label interventional study | Adults (20-65 y) with NIHL, N=80                     | Acupuncture for 15 min three times/week for 6 weeks. | Conventional treatment (not specified) | Change in PTA at 2, 4, and 8 kHz from baseline                                                                                                                                                                 | None                                                              | China Medical University Hospital  |
| NCT05086276<br>: FX-322 in adults with acquired sensorineural hearing loss                               | 2021            | Active not recruiting | Intratympanic injection of FX-322               | Phase 3 double-blind RCT        | Adults with NIHL or idiopathic sudden SNHL, N=124    | 1 dose FX-322, n=62                                  | 1 dose placebo, n=62                   | Change in speech perception using WR tests, Day 90 from baseline                                                                                                                                               | Change in PTA, tinnitus assessments, other patient report surveys | Frequency Therapeutics             |
| NCT04766853<br>: Verification of the efficacy/safety of the intratympanic drug delivery for hearing loss | 2021            | Recruiting            | Intratympanic steroid delivery for hearing loss | Randomized, double-blind study  | Adults (19+ y) with >25 dB hearing loss on PTA, N=26 | Dexamethasone + hyaluronic acid                      | Dexamethasone + saline                 | Healing of tympanic membrane 3-4 weeks post-injection, duration of drug and inflammation in middle ear with CT 1 day or week post-injection, evaluation of hearing threshold with PTA 3-4 weeks post-injection | None                                                              | Seoul National University Hospital |

|                                                                                        |      |                         |                                                |                            |                                                                                      |                                                                                                         |                               |                                                                                                              |                                                                                                                        |                                          |
|----------------------------------------------------------------------------------------|------|-------------------------|------------------------------------------------|----------------------------|--------------------------------------------------------------------------------------|---------------------------------------------------------------------------------------------------------|-------------------------------|--------------------------------------------------------------------------------------------------------------|------------------------------------------------------------------------------------------------------------------------|------------------------------------------|
| NCT04768569<br>/ Noise-Induced Hearing Loss-Acute Exposure Treatment (PINIHL-AET)      | 2021 | Enrolling by invitation | Zonisamide                                     | Phase 1 double-blind RCT   | Adults scheduled for skull-based surgery that requires $\geq 1$ h of drilling, N=180 | 100 mg zonisamide pre-op + placebo post-op, or placebo pre-op + 100 mg zonisamide post-op, n=60 each    | Placebo pre-and post-op, n=60 | Ratio of PTS-positive subjects in 30 days post-op ( $\geq 10$ dB hearing loss at any frequency from 2-6 kHz) | None                                                                                                                   | Washington University School of Medicine |
| NCT04774250<br>/ Noise-Induced Hearing Loss-Acute Exposure Treatment (UA) (PINIHL-AET) | 2021 | Enrolling by invitation | Zonisamide                                     | Phase 2 double-blind RCT   | Adult police officers scheduled for firearm training and/or certification, N=126     | 100 mg zonisamide, n=63                                                                                 | Placebo, n=63                 | Ratio of PTS-positive subjects $\geq 10$ dB shift at $\sim 30$ days after training                           | Change from baseline in DPOAE, ultra-high frequency audiometry, electrocochleography, WIN. Phenotypic genetic analysis | Washington University School of Medicine |
| NCT04482998<br>: Efficacy of Various treatments for acute acoustic trauma              | 2020 | Unknown                 | Early or delayed steroids with or without HBOT | Retrospective cohort study | Israeli Defense Force members with AAT, N=250                                        | Early (within 7 days of AAT) or late (after 7 days) delivery of steroids only, HBOT + steroids, or HBOT | No treatment                  | Hearing improvement until 1 year of AAT                                                                      | Change in tinnitus and OAE until 1 year after AAT                                                                      | Medical Corps, Israel Defense Force      |
| NCT04601909<br>: FX-322 in Adults With Age-Related Sensorineural Hearing Loss          | 2020 | Completed               | Intratympanic FX-322                           | Phase 1b double-blind RCT  | Adults with age-related SNHL, NIHL, or sudden hearing loss, N=30                     | 1 dose FX-322, n=24                                                                                     | 1 dose placebo, n=6           | Systemic and local safety, suicide risk assessment 3 months post-injection                                   | PTA, WR, WIN, and tinnitus assessments 3 months post-injection                                                         | Frequency Therapeutics                   |

|                                                                                                     |      |           |                                                                 |                                          |                                                                                       |                                                                                                                      |                                                                                                               |                                                                                                         |                                                                                                                 |                                       |
|-----------------------------------------------------------------------------------------------------|------|-----------|-----------------------------------------------------------------|------------------------------------------|---------------------------------------------------------------------------------------|----------------------------------------------------------------------------------------------------------------------|---------------------------------------------------------------------------------------------------------------|---------------------------------------------------------------------------------------------------------|-----------------------------------------------------------------------------------------------------------------|---------------------------------------|
| NCT03878875<br>: Does Sound Conditioning Protect Against Temporary Hearing Damage                   | 2019 | Completed | Sound conditioning (low level noise) before loud music exposure | Observational cohort study               | Adults (18-35 y) with normal hearing, with or without prior loud music exposure, N=40 | 10 min low level noise before loud recreational music exposure in subjects with prior history of high exposure, n=20 | 10 min low level noise before loud recreational music exposure in subjects with history of low exposure, n=20 | Change in PTA, DPOAE, TFI, MEMR, SIN 1 day and 1 week post-experimental exposure                        | None                                                                                                            | Imperial College Healthcare NHS Trust |
| NCT03834714<br>: Noise Exposure and Near-Infrared Light                                             | 2019 | Completed | NIR light therapy (Earlight Generation 1.4 device)              | Randomized, double-blind crossover study | Adults (18-45 y) with normal hearing, N=14                                            | 4 sessions noise stimulus and 2 sessions NIR light                                                                   | 4 sessions noise stimulus and 2 sessions sham                                                                 | Change from baseline in air conduction threshold (500-8000 Hz)                                          | Change in OAE and central auditory performance from baseline                                                    | University of Miami                   |
| NCT04120116<br>: FX-322 in Adults With Stable Sensorineural Hearing Loss                            | 2019 | Completed | Intratympanic administration of FX-322                          | Phase 2a double-blind RCT                | Adults (18-65 y) with stable NIHL or sudden SNHL, N=95                                | 1, 2, or 4 doses FX-322                                                                                              | 4 doses placebo                                                                                               | Change from baseline in speech intelligibility, WIN, PTA at Day 210 post-injection. Safety of injection | Change in extended high frequency PTA, surveys of tinnitus and hearing ability                                  | Frequency Therapeutics                |
| NCT02779192<br>: A Phase 2b Study of SPI-1005 to Prevent Acute Noise Induced Hearing Loss (PANIHL)  | 2016 | Unknown   | SPI-1005 (ebselen) prior to sound challenge                     | Phase 2b double-blind RCT                | Adults (18-50 y) with history of noise exposure, N=180                                | Oral 200 or 400 mg ebselen, twice daily, 7 days                                                                      | Twice daily placebo                                                                                           | Reduction in the incidence of a significant PTA shift, 1 day post-sound challenge from baseline         | Improvement in WR score within 1 day post sound challenge                                                       | Sound Pharmaceuticals, Inc.           |
| NCT02259595<br>: Study to Determine the Safety, Tolerability, and Pharmacokinetic Profile of HPN-07 | 2014 | Completed | HPN-07 or HPN-07 + NAC                                          | Phase 1 double-blind RCT                 | Healthy adults (18-55 y), N=32                                                        | 1 dose HPN-07 maximum tolerated dose plus NAC 120 mg                                                                 | 1 dose HPN-07 500, 1000, or 1500 mg plus placebo                                                              | Safety and tolerability of HPN-07, alone and in co-administration with NAC                              | Area under the curve, maximum plasma concentration, half-life, volume of distribution, mean transit time, total | Otologic Pharmaceuticals, Inc.        |

|                                                                                    |      |           |                                                                |                                                             |                                                                                           |                                                                                                              |                                         |                                                             |                                                                                   |                                          |
|------------------------------------------------------------------------------------|------|-----------|----------------------------------------------------------------|-------------------------------------------------------------|-------------------------------------------------------------------------------------------|--------------------------------------------------------------------------------------------------------------|-----------------------------------------|-------------------------------------------------------------|-----------------------------------------------------------------------------------|------------------------------------------|
| and HPN-07 Plus NAC                                                                |      |           |                                                                |                                                             |                                                                                           |                                                                                                              |                                         |                                                             | clearance at various intervals post-dosing                                        |                                          |
| NCT02257983 : Protective Effects of EPI-743 on Noise-Induced Hearing Loss          | 2014 | Completed | EPI-743 prior to loud noise exposure                           | Phase 2a double-blind RCT                                   | Healthy adults (18-30 y), N=77                                                            | 9 days twice-daily EPI-743 400 mg, noise exposure on Day 8                                                   | 9 days placebo, noise exposure on Day 8 | Change in PTA at Day 9 from baseline                        | Time to recovery following acute noise exposure on Day 9                          | Edison Pharmaceuticals, Inc.             |
| NCT02049073 : Prevention of Noise-induced Hearing Loss                             | 2014 | Withdrawn | Zonisamide or methyl-prednisolone prior to loud music exposure | Open label parallel assignment study                        | Healthy adults (18-30 y), N not stated                                                    | Oral zonisamide 100 or 200 mg daily for 2 weeks or as 1 dose; or 1 dose oral methyl-prednisolone 32 or 64 mg | no medication                           | PTA at 2,3,4 and 6 kHz 15 minutes post-4 h music exposure   | DPOAE and extended intervals of PTA testing                                       | Washington University School of Medicine |
| NCT01727492 : Prevention of noise induced damage by use of antioxidants            | 2012 | Unknown   | NAC and Mg prior to leisure noise                              | Randomized double-blind placebo-controlled cross-over study | Adults (18-25 y) with temporary tinnitus after noise exposure: loudness >5 on a VAS, N=30 | 600 mg NAC and 200 mg Mg                                                                                     | Placebo                                 | 50% decrease in tinnitus loudness scored on VAS vs. placebo | . 50% decrease in tinnitus duration scored on VAS and decrease in TTS vs. placebo | University Hospital, Antwerp             |
| NCT00802425 / Efficacy of AM-111 in Patients With Acute Sensorineural Hearing Loss | 2008 | Completed | Intratympanic injection of AM-111                              | Phase 2 double-blind RCT                                    | Adults (18-60 y) with unilateral acute SNHL (including noise) with onset ≤48 h, N=210     | Single dose intratympanic AM-111 high or low dose (dose not specified)                                       | Single dose intratympanic placebo       | Change in hearing loss in dB from baseline and Day 7        | Change in hearing loss in dB from baseline and Days 3, 30, 90                     | Auris Medical AG                         |

See Table 2 for registered completed trials that have reported results. Abbreviations: Abbreviations: AAT, acute acoustic trauma; CT, computed tomography; dB, decibel; DPOAE, distortion product otoacoustic emissions; h, hour; HBOT, hyperbaric oxygen therapy; kHz, kilohertz; MEMR, middle ear muscle reflex; Mg, magnesium; min, minutes; NAC, N-acetylcysteine; NIHL, noise-induced hearing loss; NIR, near infrared; op, operation; PTA, pure tone audiometry; RCT, randomized controlled trial; SIN, speech in noise; SNHL, sensorineural hearing loss; TFI, Tinnitus Functional Index; TTS, temporary threshold shift; VAS, Visual Analog Scale; WIN, words in noise test; WR, word recognition; y, year.
